# Supplementary material for: Hepatic non-parenchymal S100A9-TLR4-mTORC1 axis normalizes diabetic ketogenesis
Source: Nat Commun. 2022 Jul 15;13:4107. doi: 10.1038/s41467-022-31803-5 (PMC9287425; doi:10.1038/s41467-022-31803-5)
Supplement: Supplementary file 1 — Supplementary Information [file 41467_2022_31803_MOESM1_ESM.pdf]

# Supplemental Information

**Figure S1**

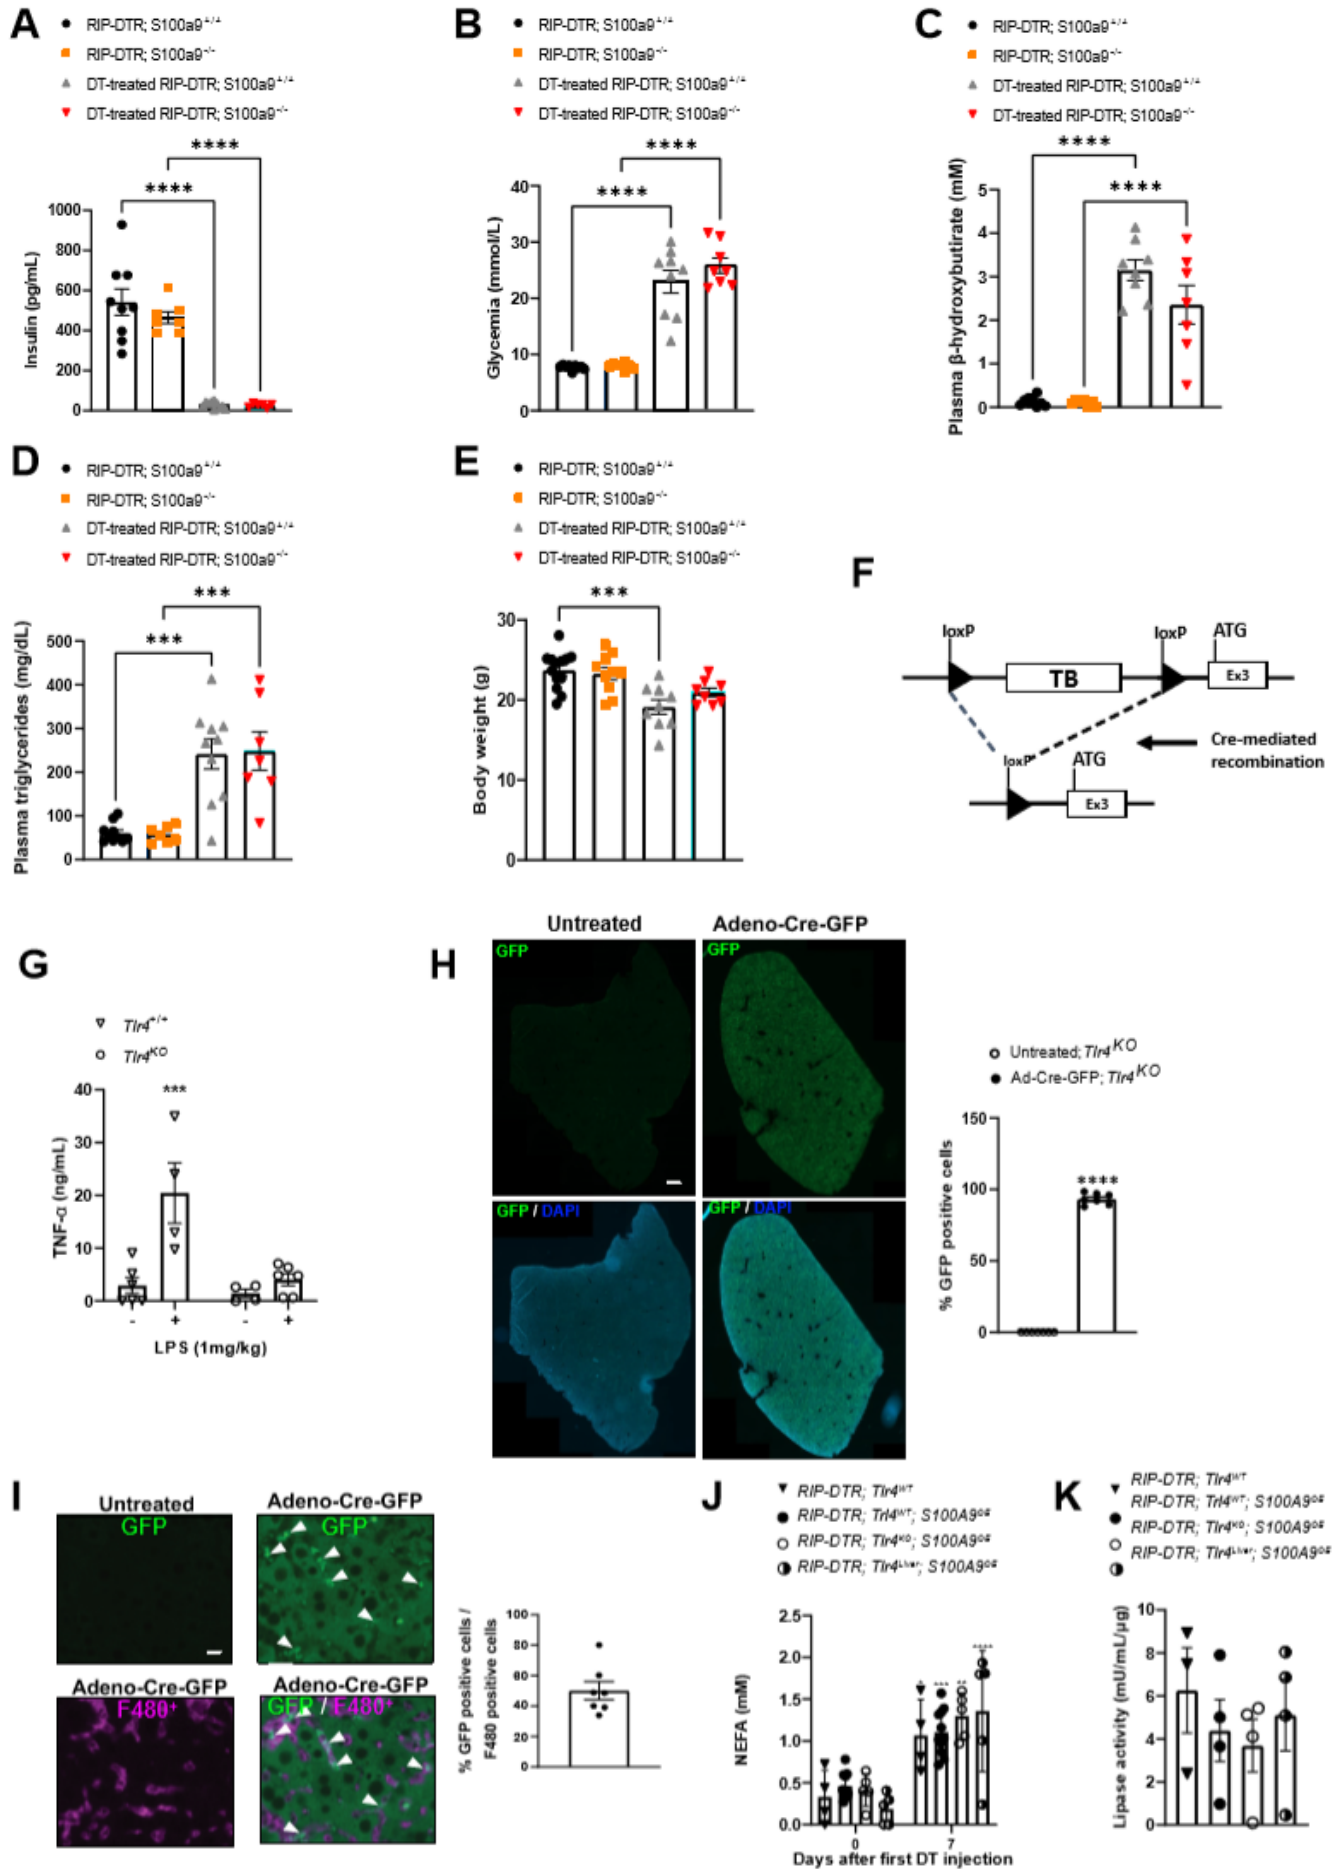

### Supplemental figure 1. S100A9 suppresses diabetic ketogenesis via hepatic TLR4

(A) Plasma insulin (n/group = 7-9) ( $p=0.0001$ ), (B) glycemia (n/group = 7-13) ( $p=0.0001$ ), (C) plasma  $\beta$ -hydroxybutyrate levels (n/group = 7-10) ( $p=0.0001$ ), (D) plasma triglycerides (TG) (n/group = 7-10) ( $p=0.0001$ ,  $p=0.0006$ ), and (E) Body weight (n/group = 7-13) of 12-week-old DT-untreated *RIP-DTR*; *S100a9*<sup>-/-</sup> and *RIP-DTR*; *S100a9*<sup>+/+</sup> mice and DT-treated *RIP-DTR*; *S100a9*<sup>-/-</sup> and *RIP-DTR*; *S100a9*<sup>+/+</sup> mice ( $p=0.0003$ ) (pertinent to the DT-treated groups, samples were collected 7 days after the last DT injection). To avoid post-prandial confounding effects, data shown in A-D were collected from mice after 3 hours of fasting. (F) Schematic of the *Tlr4LoxTB* allele and PCR analysis of genomic DNA isolated from *Tlr4*<sup>WT</sup> and *Tlr4*<sup>LoxTB/+</sup> mice (G) Lipopolysaccharide (LPS, 1mg/kg body weight) was injected intraperitoneally to chow-fed mice. Blood was collected 1.5 h after LPS administration and plasma TNF- $\alpha$  levels were measured by Elabscience ELISA (n/group = 4-6) ( $p=0.001$ ). (H) Representative images of immunofluorescence from liver of *Tlr4LoxTB* allele (*Tlr4*<sup>KO</sup>) mice treated with  $1 \times 10^9$  PFU Adenovirus serotype 5 expressing Cre and GFP with a strong tropism for hepatic tissue. 10 days after infection, mice were sacrificed and livers fixed in 4% PFA and stained for detection of GFP (green), and DAPI (blue). 7 Evenly spaced sections were quantified for % GFP expressing cells. Scale bar= 200um ( $p=0.0001$ ). (I) Representative images of immunofluorescence from samples as in (H) were stained to detect GFP and F480, and relative quantification of percentage of F480 positive cells that are positive also for GFP (n/group=3). Scale bar=50um. (J) Plasma NEFA levels of *RIP-DTR*; *Tlr4*<sup>WT</sup>, *RIP-DTR*; *Tlr4*<sup>WT</sup>; *S100A9*<sup>OE</sup>, *RIP-DTR*; *Tlr4*<sup>KO</sup>; *S100A9*<sup>OE</sup>, *RIP-DTR*; *Tlr4*<sup>Liver</sup>; *S100A9*<sup>OE</sup> mice (n/group= 4-6) ( $p=0.053$ ,  $p=0.0009$ ,  $p=0.0025$ ,  $p=0.0001$ ) (K) Lipase activity in perigonadal fat of the aforementioned groups (n/group=3-4). Error bars represent SEM. Statistical analyses were done using one-way ANOVA (Tukey's post-hoc test) or 2 tailed student's t-test H, except for G, where mixed effects model was used. \* $P<0.05$ , \*\* $P<0.01$ , \*\*\* $P<0.001$ , \*\*\*\* $P<0.0001$ . Related to Figure 1.

Figure S2

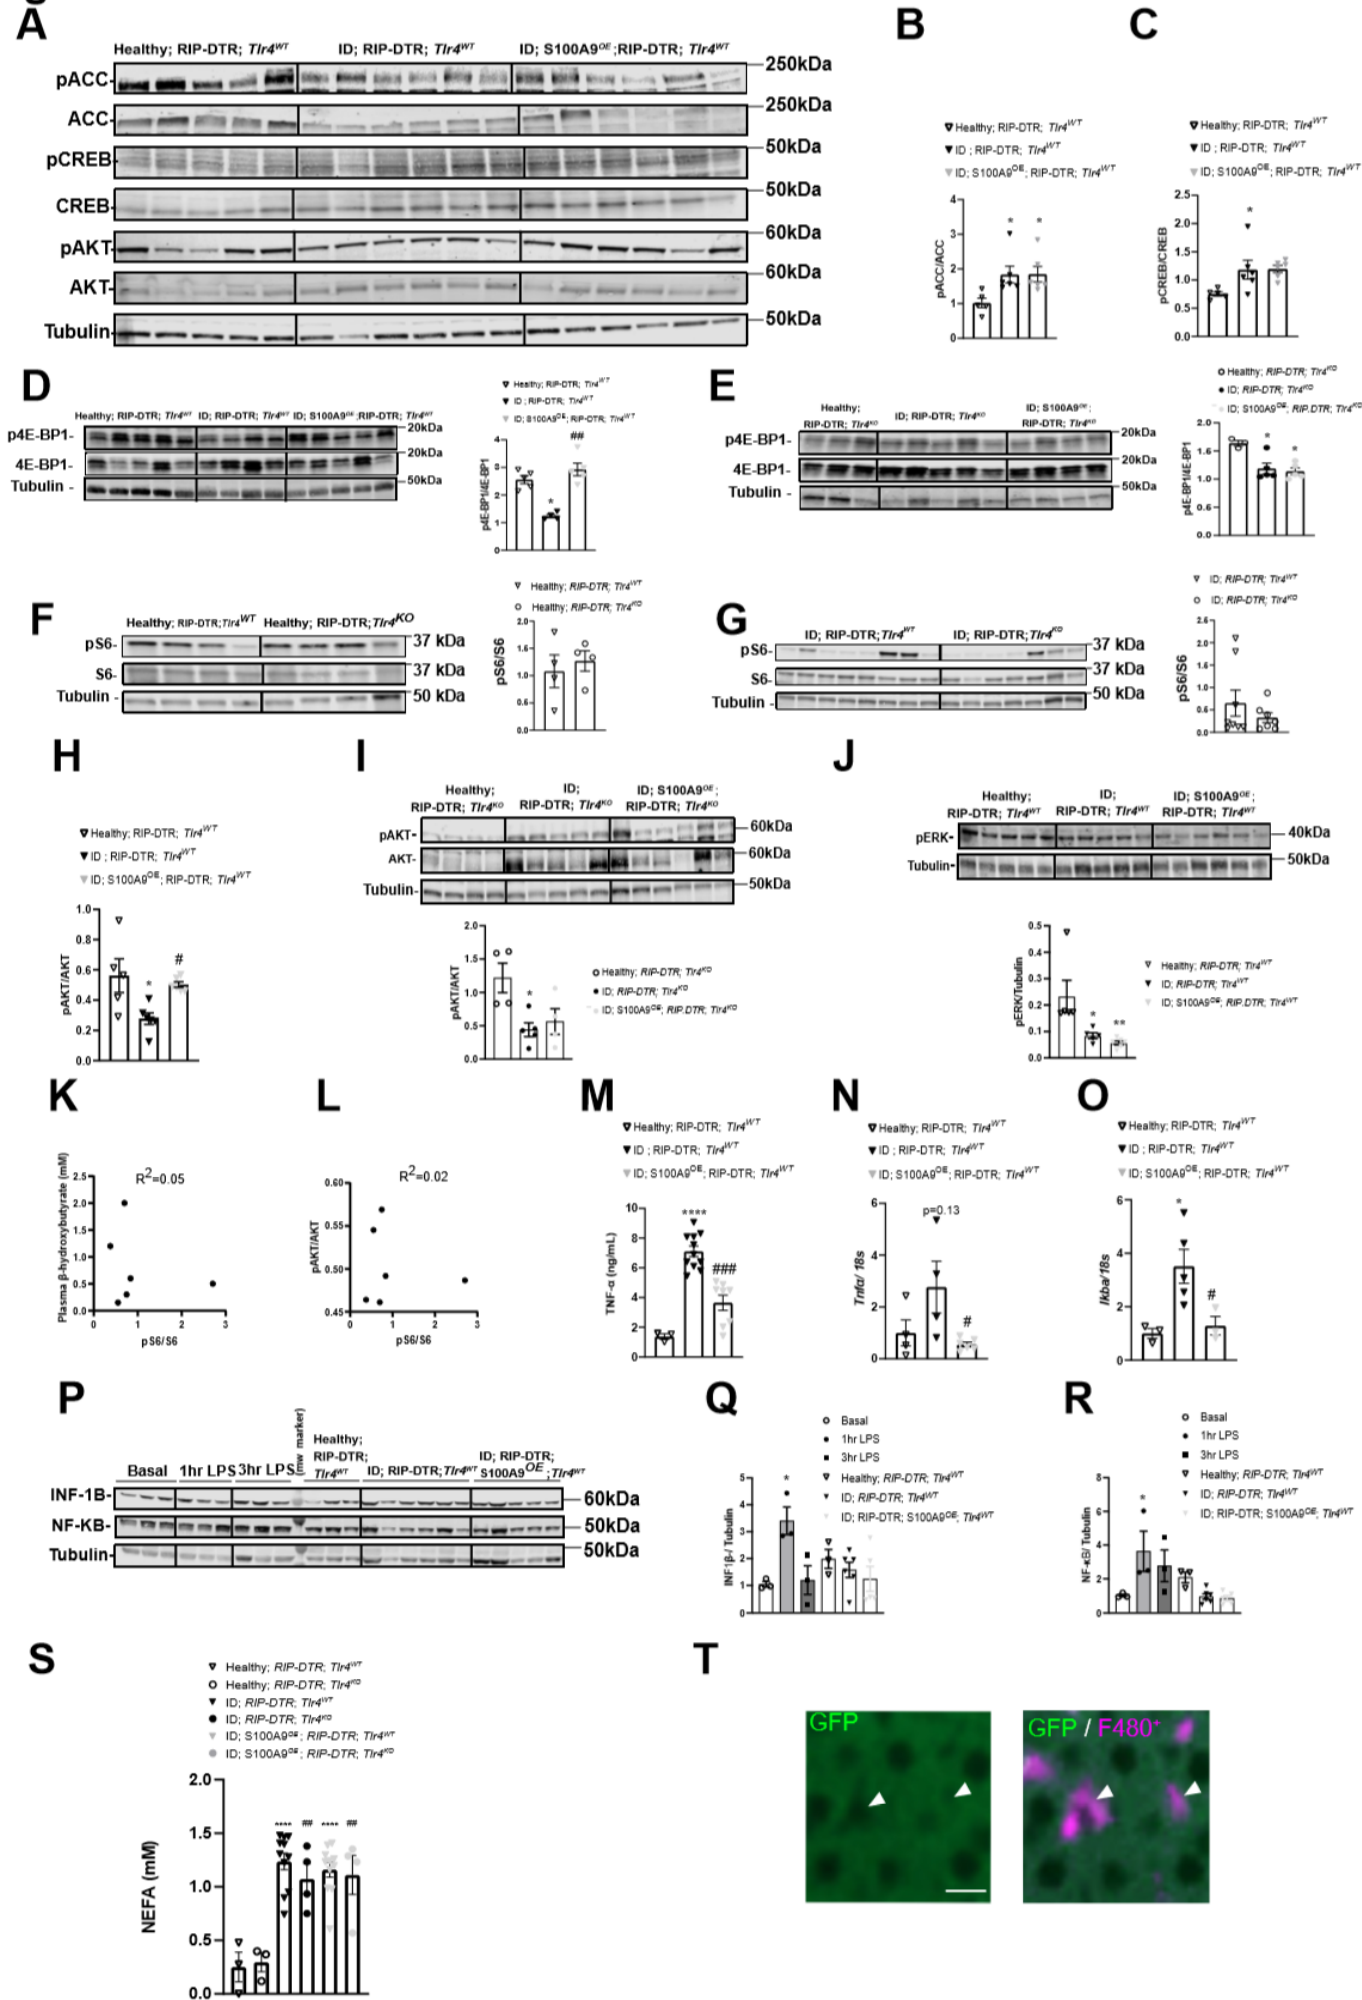

**Supplemental figure 2. S100A9 overexpression does not affect hepatic AMPK or glucagon receptor signaling.** (A) RIP-DTR; *Tlr4*<sup>WT</sup> mice were made insulin deficient (ID) with DT and underwent HTVI of either a plasmid encoding for mouse S100A9 (RIP-DTR; S100A9<sup>OE</sup>) (n=6) or empty vector (n=6). 7 days into insulin deficiency liver lysates from these mice and healthy controls (n=5) were analyzed by immunoblotting the indicated proteins and phosphorylation states. (B-C). Densitometry of immunoblot from (A) (p= 0.021 and p=0.03 for (B). p= 0,044 and p=0.055 for (C)). (D) Liver lysates from *Tlr4*<sup>WT</sup> healthy, ID or ID; S100A9<sup>OE</sup> mice were analyzed for the indicated proteins and phosphorylation states (n/group= 5, 4 and 5) (p=0.0007, p=0.0001) (E). Liver lysates from *Tlr4*<sup>KO</sup> healthy, ID or ID; S100A9<sup>OE</sup> mice were analyzed for the indicated proteins and phosphorylation states (n/group= 3, 5 and 4) (p=0.007, p=0.004). Healthy *Tlr4*<sup>WT</sup> (n= 4) and *Tlr4*<sup>KO</sup> mice (n=4) (F) and ID (G) *Tlr4*<sup>WT</sup> (n=8) and *Tlr4*<sup>KO</sup> (n=7) mice were analyzed by immunoblotting for the indicated proteins and phosphorylation states. (H) Densitometry of immunoblot from (A) (p=0.017, p=0.046). (I) Healthy, ID and S100A9<sup>OE</sup> RIP-DTR; *Tlr4*<sup>KO</sup> mouse liver lysate was analyzed by immunoblotting the indicated proteins and phosphorylation states (n/group= 4, 5 and 6) (p=0.02). (J) Healthy, ID and S100A9<sup>OE</sup> RIP-DTR; *Tlr4*<sup>WT</sup> mouse liver lysate was analyzed by immunoblotting the indicated proteins and phosphorylation states (n/group=5, 5 and 6) (p=0.02, p=0.004). Correlation analysis of hepatic pS6/S6 levels with plasma  $\beta$ -hydroxybutyrate levels (K) and pAKT/AKT levels (L). (M) Plasma samples from healthy, ID and ID; S100A9<sup>OE</sup> mice was analyzed for TNF $\alpha$  levels by ELISA (n/group= 3, 11 and 8) (p=0.0001). qRT-PCR analysis of *Tnf $\alpha$*  (n/group= 4, 4 and 6) (N) and *IK- $\beta$  $\alpha$*  (n/group= 3, 5 and 3) (p=0.04) (O) from livers of RIP-DTR healthy, ID or ID; S100A9<sup>OE</sup> mice (p=0.028, 0.048). (P) Healthy RIP-DTR mice were treated with 10mg/kg i.p LPS and were sacrificed 1 and 3 hours after injection. Liver lysates were run alongside lysates from RIP-DTR healthy, ID or ID; S100A9<sup>OE</sup> mice and analyzed for the indicated proteins (Q-R) Densitometry of blots from P (n/group=3, 3, 3, 3, 6 and 5) (p=0.022 (Q) (p=0.039 (R)). (S) Plasma Non-Esterified Fatty Acid (NEFA) levels of *Tlr4*<sup>WT</sup> and *Tlr4*<sup>KO</sup> RIP-DTR healthy, ID or ID; S100A9<sup>OE</sup> mice (n/group = 3, 3,10, 4, 11 and 4) (p=0.001, p=0.005, p=0.0001, p=0.003). (T) *Tsc1*<sup>fl/fl</sup> mice were treated with 1x10<sup>9</sup> PFU of Adenovirus-- TBG-GFP. 10 days after injection mice were sacrificed and livers were fixed in 4% formaldehyde, embedded in paraffin and stained for GFP (green) HNF-4 $\alpha$  and F4-80<sup>+</sup> (magenta). Scale bar=50 $\mu$ m. Error bars represent SEM, statistical analyses were done using one way or two-way ANOVA (Tukey's post-hoc test) except for C where FDR was used \*p $\leq$  0.05. For I and J correlation analysis was performed using Pearson's r. Western blot images shown in D-F and Pare cropped images. Source data are provided as a source data file. Related to Figures 2 and 3.

Figure S3

A

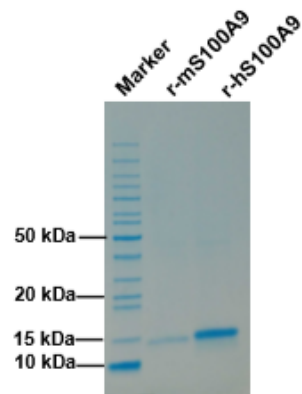

B

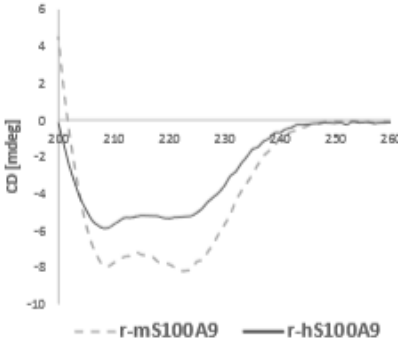

C

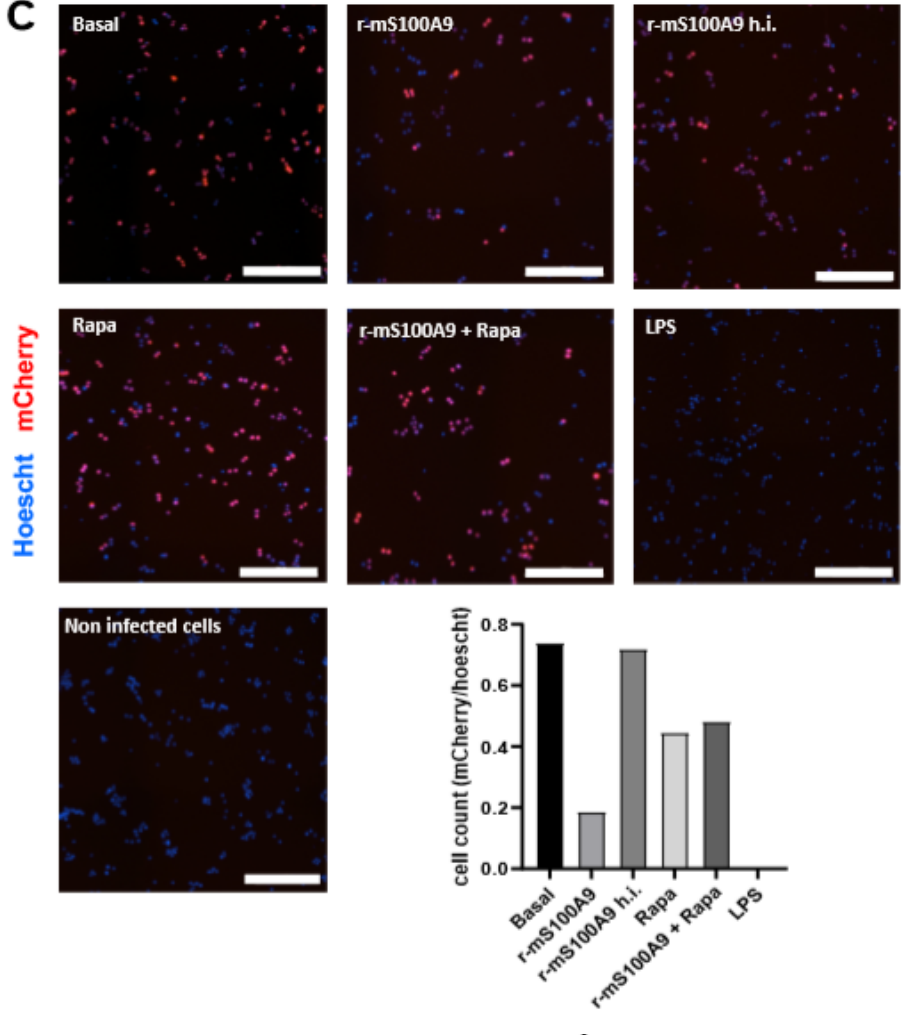

D

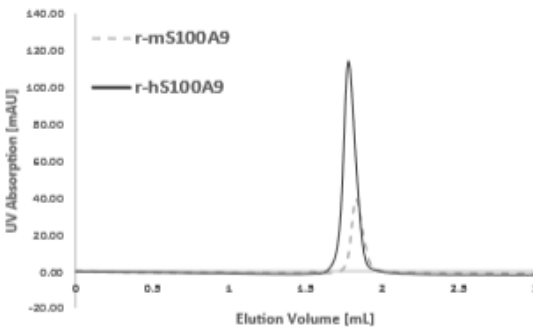

E

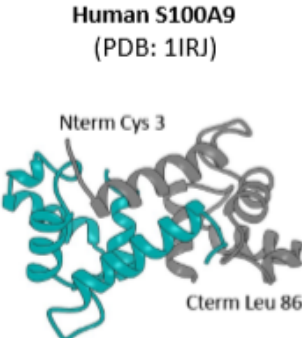

F

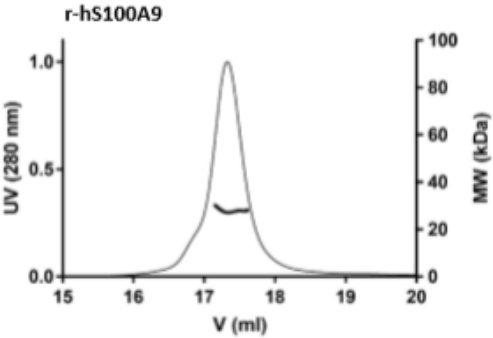

G

Human-- 1 MTCNLSQERDQIIMTFHQISVKKBPDTLQGLKELARKLQMTCKKNNKKV  
Mouse-- 1 MTCNLSQERDQIIMTFHQISVKKBPDTLQGLKELARKLQMTCKKNNKKV  
Human-- 60 ERMEDLDYNQGLSFEELMLMADCTVABERKNSQ-E-PCRRKKFEGTTP 114  
Mouse-- 61 ERMEDLDYNQGLSFEELMLMADCTVABERKNSQ-E-PCRRKKFEGTTP 113

H

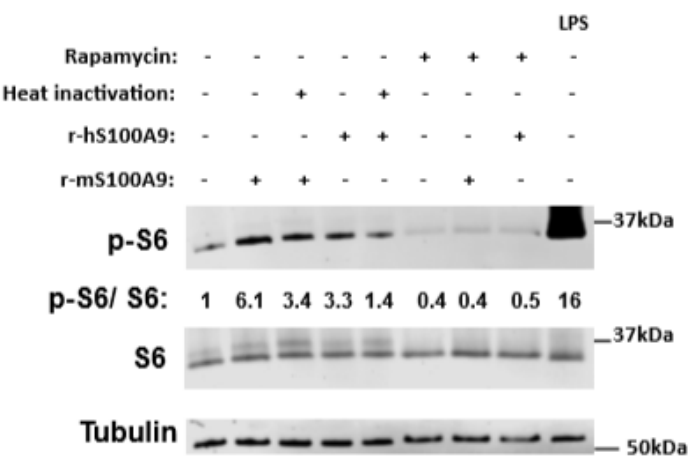

**Supplemental Figure 3. Production of r-mS100A9 and r-hS100A9.** (A) SDS page of r-mS100A9 and r-hS100A9. (B) Far UV circular dichroism spectra of r-hS100A9 (dark gray) and r-mS100A9 (dashed light gray) at roughly 5  $\mu$ M concentration. (C) Representative image of immunofluorescence in RAW264.7 cells expressing mCherry-TOSI treated incubated with 2 $\mu$ g/mL of r-mS100A9 or r-hS100A9 (or their heat inactivated (h.i) forms) or 1 $\mu$ g/mL of lipopolysaccharides (LPS, from *E.coli* O111:B4, Sigma) for 4 hours, with or without 20uM Rapamycin . Quantification of mCherry positive cells / total cells is also shown. Scale bar= 100 $\mu$ m. n= 1x10<sup>6</sup> cells examined. (D) Analytical size-exclusion chromatography (SEC) using a Superose 6 Increase 3.2/300 column (Cytiva) of r-hS100A9 (dark gray) and of r-mS100A9 (dashed light gray), eluting at similar elution volumes of 1.78 mL and 1.83 mL, respectively. (E) Crystal structures of homodimeric S100A9 (cyan and gray). (F) Size-Exclusion-Chromatography Multi-Angle Light Scattering analysis of the r-hS100A9 showing a homodimer formation in solution. (G) Comparison of amino acid sequence between human and murine S100A9 (homology is highlighted in black). (H) THP-1 cells were incubated with 2 $\mu$ g/mL of r-mS100A9 or r-hS100A9 (or their heat inactivated controls) or 1 $\mu$ g/mL of lipopolysaccharide (LPS, from *E.coli* O111:B4, Sigma) for 4 hours with or without 20uM Rapamycin and cell lysates were analyzed by western blot. 1x10<sup>6</sup> cells were analyzed per condition. Related to Figure 4.

**Figure S4**

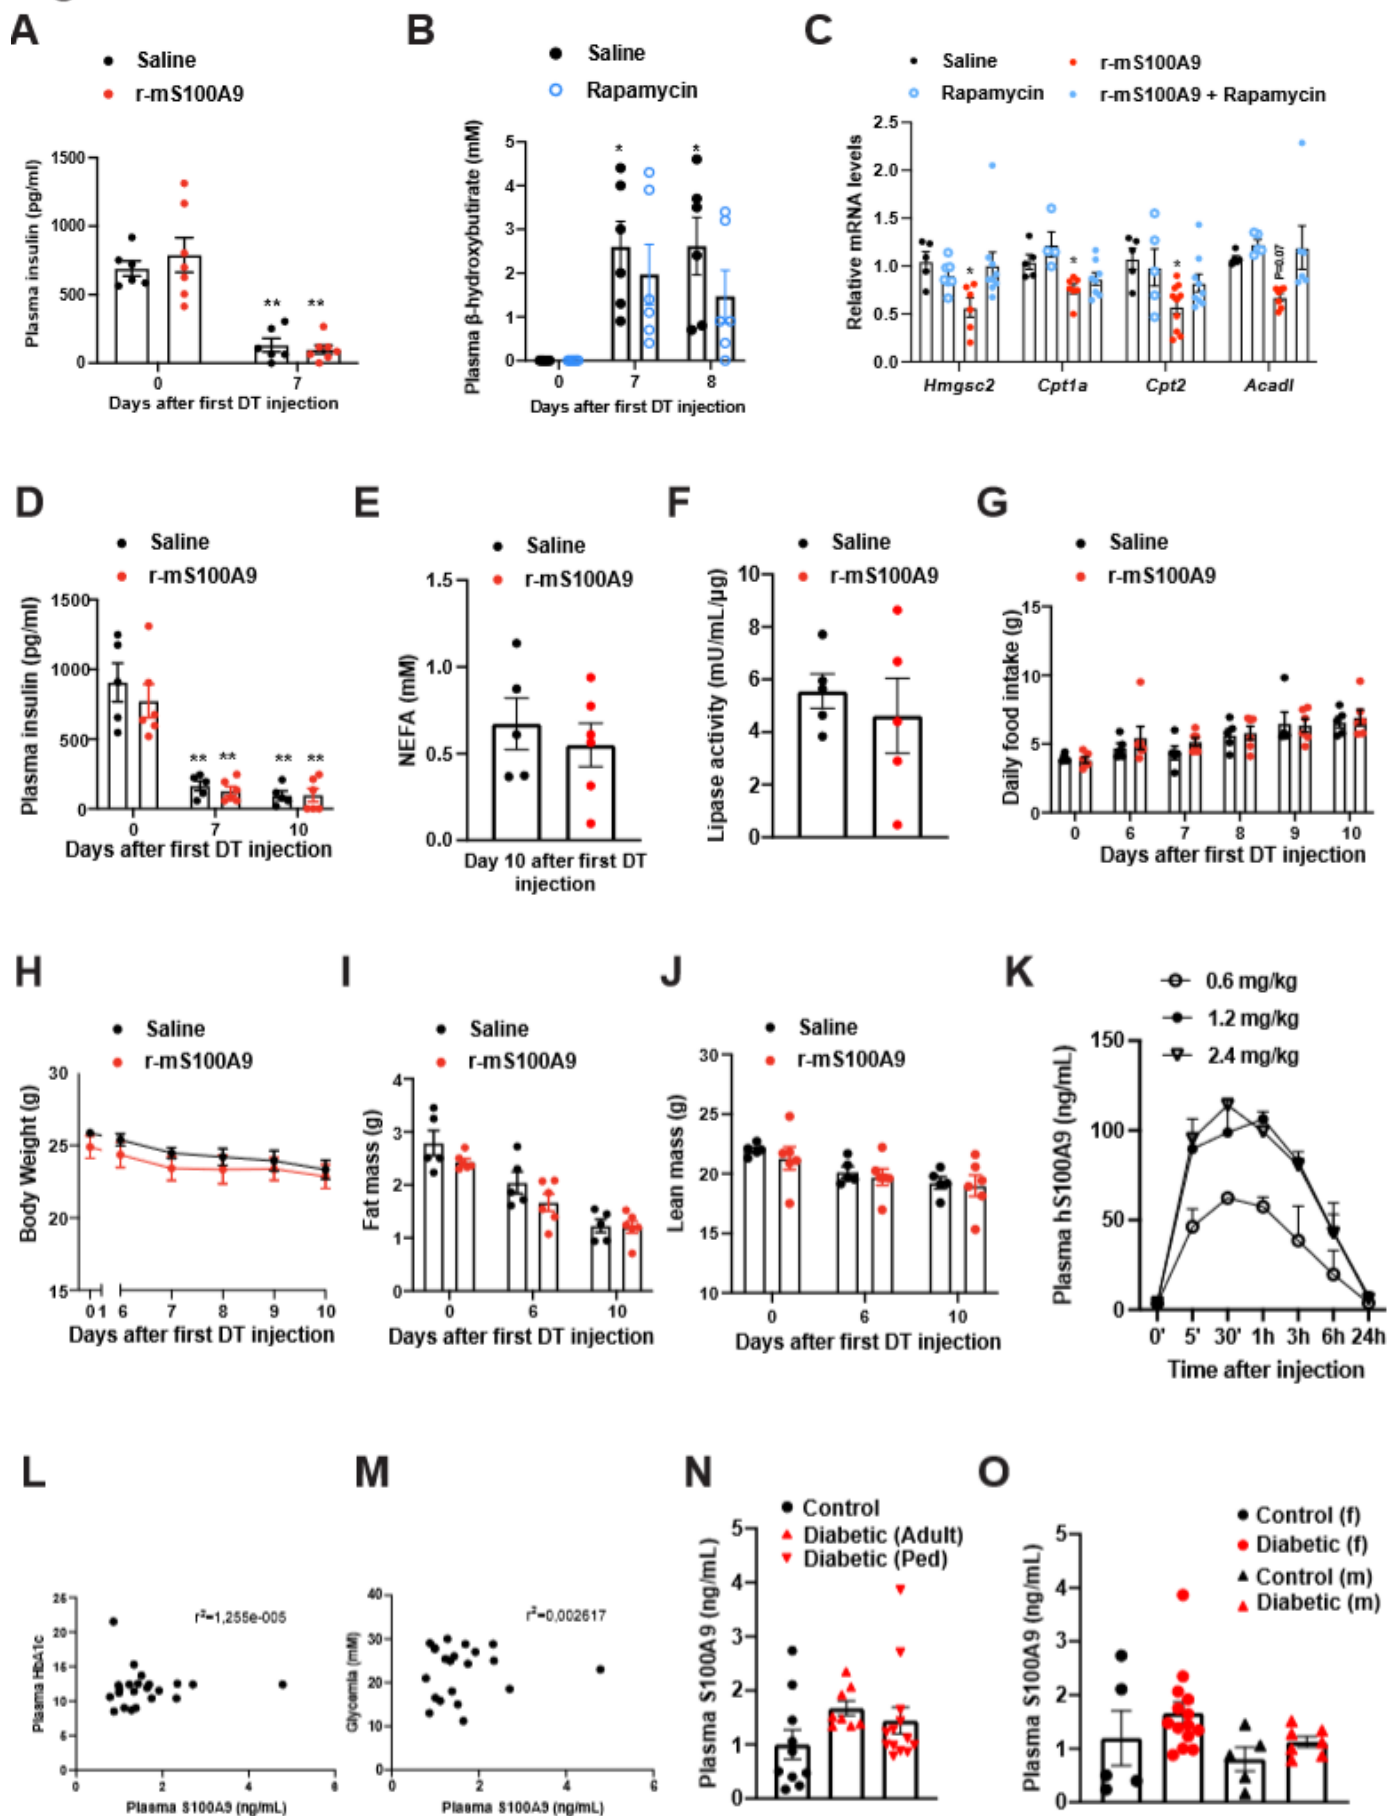

**Supplemental Figure 4. Safety of r-mS100A9 administration *in-vivo*.** (A) Plasma insulin in DT treated mice at day 0 and 7 days after first DT injection (cohort indicated in Figure 5A) (n/group= 6, 7) (p=0.001). (B) RIP-DTR mice were rendered insulin deficient with DT and at day 8 were given intraperitoneal injections of either saline (n= 6) or 10mg/kg rapamycin (n= 6) and plasma  $\beta$ -hydroxybutyrate was measured (p=0.015, p=0.014). Metabolic assessments were done 3 hours after injection and food removal. (C) qRT-PCR analysis of genes from livers of ID RIP-DTR saline, rapamycin (10mg/kg), r-mS100A9 (0.6mg/kg), and rapamycin+r-mS100A9 treated mice (n/group= 5, 5, 9 and 8) (p=0.041, 0.049, 0.012). (D) Plasma insulin levels measured 0, 7 and 10 days after first DT injection (n/group=5, 6) (p=0.001). (E) Plasma NEFA levels (n/group=5, 6) and (F) adipose tissue lipase activity of r-mS100A9- and saline -injected control mice 7 days after first DT injection (n/group=5, 5). (G) Daily food intake, (H) body weight, (I) fat mass, and (J) lean mass of r-mS100A9- and saline -injected controls injection (cohort indicated in Figure 5G) (n/group=5, 6). (K) Plasma pharmacokinetic after subcutaneous injection of r-hS100A9 (n/group=2). (L) Correlation analysis of plasma S100A9 with HbA1c and (M) Glycemia (mM) in human diabetic patient samples (n=23). (N) Plasma S100A9 levels in diabetic adult (n=8) and pediatric (n=13) human patient samples and healthy controls. (O) Plasma S100A9 levels in male (m) and female (f) control and diabetic samples (n/group=5, 14 5, 7). Error bars represent SEM, statistical analyses were done using two-tailed t-test, or one way or two-way ANOVA (Tukey's post-hoc test) except in C where FDR was used. \*\*p $\leq$  0.01 and \*\*\*p $\leq$  0.001 showing comparison to basal. For L and M correlation analysis was performed using Pearson's r. Related to Figures 6 and 7.

**Supplementary Table 1:** List of sequence of primers used for real-time-qPCR. List of antibodies used for Western Blotting and Immunohistochemistry procedures.

| Gene                           | Forward                   | Reverse                 |
|--------------------------------|---------------------------|-------------------------|
| 18s                            | ACCGCAGCTAGGAATAATGA      | GCCTCAGTTCCGAAAACCA     |
| Tlr4                           | CGCTGCCACCAGTTACAGAT      | AGGAACTACCTCTATGCAGGG   |
| Hmgcs2                         | ATACCACCAACGCCTGTTATGG    | CAATGTCACCACAGACCACCAG  |
| Cpt1a                          | CCATGAAGCCCTCAAACAGATC    | ATCACACCCACCACCACGATA   |
| Cpt1b                          | AGAAGTGTAGGACCAGCCCG      | ACTTGCCTT TGTCCCGGAAAT  |
| Cpt2                           | GGATAAACAGAATAAGCACACC    | GAAGGAACAAAGCGGATGAG    |
| Acadl                          | CTTGGAAGAGCAAGCGTACT      | CTGTTCTTTTGTGCCGTAATTCG |
| Tsc1                           | TCAAGCACCTCTTCTGCCTT      | GTCACATGGCCTGGTTTCTT    |
| IK- $\beta$                    | CGGAGGACGGAGACTCGTT       | CCATGGTCAGCGGCTTCT      |
| TNF $\alpha$                   | CCACGCTCTTCTGTCTACTGAACT  | GATGAGAGGGAGGCCATTTG    |
| Antibody                       |                           |                         |
| Name                           | Supplier                  | Reference               |
| Phospho-S6 (Ser240/244         | Cell Signaling Technology | 5364                    |
| S6                             | Cell Signaling Technology | 54D2                    |
| S100A9 (mouse)                 | Boster                    | PB9678                  |
| S100A9 (human)                 | Boster                    | PB9676                  |
| $\alpha$ -Tubulin              | Proteintech               | 11224-1-AP              |
| Na-K-ATPase                    | Cell Signaling Technology | 3010                    |
| KDMI/LSD1                      | Abcam                     | ab140365                |
| GFP                            | Abcam                     | ab13970                 |
| Phospho Acetyl CoA Carboxylase | Cell Signaling Technology | 3661                    |
| Acetyl CoA Carboxylase         | Cell Signaling Technology | 3662                    |
| Phospho CREB                   | Cell Signaling Technology | 9198                    |
| CREB                           | Cell Signaling Technology | 9104                    |
| HNF-4 $\alpha$                 | Santa cruz                | sc-374229               |
| F4-80 <sup>+</sup>             | Cell Signaling Technology | 70076                   |
| mCherry                        | Thermo Fisher             | M11217                  |
| Phospho 4E-BP1(Thr37/46)       | Cell Signaling Technology | 2855                    |
| 4E-BP1                         | Cell Signaling Technology | 9644                    |

**Supplementary Table 2:** List of diabetic patient samples used for analysis.

| Patient ID# | Clinical Presentation  | HbA1c | Adult/Ped. | Age range (Years)<br>0 ≤ a ≤ 10<br>11 ≤ b ≤ 25<br>26 ≤ c ≤ 50<br>d > 50 | Sex | Sample Type | Glycemia (mM) | βHB (mM) | S100A9 (ng/mL) |
|-------------|------------------------|-------|------------|-------------------------------------------------------------------------|-----|-------------|---------------|----------|----------------|
| 1           | DKA (not inaugural)    | 15,3  | Adult      | c                                                                       | M   | plasma      | 25            | 12,6     | 1,3            |
| 2           | DKA inaugural diabetes | 10,4  | Adult      | c                                                                       | F   | plasma      | 24,3          | 7,3      | 1,7            |
| 3           | DKA inaugural diabetes | 11,5  | Adult      | c                                                                       | F   | plasma      | 27            | 9,3      | 1,9            |
| 4           | DKA inaugural diabetes | 9     | Adult      | b                                                                       | F   | plasma      | 18            | 6,8      | 1,4            |
| 5           | DKA inaugural diabetes | 12,3  | Pediatric  | b                                                                       | F   | serum       | 28            | 1,7      | 1,0            |
| 6           | DKA inaugural diabetes | 12,5  | Pediatric  | b                                                                       | F   | plasma      | 26            | 11,9     | 1,4            |
| 7           | DKA inaugural diabetes | 12,4  | Adult      | c                                                                       | F   | plasma      | 23            | 8,7      | 4,8            |
| 8           | DKA inaugural diabetes | 12,4  | Pediatric  | b                                                                       | M   | plasma      | 18,5          | 10,2     | 2,7            |
| 9           | DKA inaugural diabetes | 12,4  | Pediatric  | a                                                                       | F   | plasma      | 17,9          | 8,4      | 6,8            |
| 10          | DKA inaugural diabetes | 13,7  | Adult      | c                                                                       | M   | plasma      | 15            | 8,3      | 1,5            |
| 11          | DKA inaugural diabetes | 11,7  | Pediatric  | b                                                                       | F   | plasma      | 16,5          | 5,2      | 1,0            |
| 12          | DKA inaugural diabetes | 21,5  | Pediatric  | b                                                                       | M   | serum       | 13            | 2,3      | 0,9            |
| 13          | DKA inaugural diabetes | 11,9  | Pediatric  | a                                                                       | F   | plasma      | 11,2          | 5,8      | 1,6            |
| 14          | DKA inaugural diabetes | 8,7   | Pediatric  | a                                                                       | M   | plasma      | 30            | 11,4     | 1,3            |
| 15*         | DKA (not inaugural)    | 12,5  | Adult      | b                                                                       | F   | plasma      | 25            | 11,6     | 2,3            |
| 16          | DKA inaugural diabetes | 8,5   | Pediatric  | a                                                                       | F   | serum       | 29            | 11,1     | 0,9            |
| 17          | DKA inaugural diabetes | 10,6  | Pediatric  | a                                                                       | M   | serum       | 21            | 2,7      | 0,8            |
| 18          | DKA inaugural diabetes | 12,4  | Pediatric  | a                                                                       | F   | plasma      | 25,4          | 11,4     | 1,2            |
| 19          | DKA inaugural diabetes | 11,2  | Pediatric  | a                                                                       | M   | serum       | 27,7          | 2,7      | 1,0            |
| 20          | DKA inaugural diabetes | 9     | Pediatric  | a                                                                       | M   | plasma      | 15,8          | 2,0      | 1,1            |
| 21          | DKA (not inaugural)    | 12,4  | Adult      | c                                                                       | F   | plasma      | 28,8          | 13,1     | 1,7            |
| 22          | DKA inaugural diabetes | 11,4  | Pediatric  | a                                                                       | F   | plasma      | 25            | 9,0      | 1,3            |
| 23          | DKA (not inaugural)    | 10,4  | Adult      | d                                                                       | M   | serum       | 28,8          | 12,3     | 2,3            |

\* Average value of 4 repeated samples taken

**Supplementary Table 3:** List of control patient samples used for analysis

| Sex | Age range<br>(Years)<br>0 ≤ a ≤ 10<br>11 ≤ b ≤ 25<br>26 ≤ c ≤ 50<br>d > 50 | Source | plasma/serum | βHB (mM) | S100A9<br>(ng/mL) |
|-----|----------------------------------------------------------------------------|--------|--------------|----------|-------------------|
| M   | d                                                                          | CTS    | plasma       | 0        | 0,2               |
| F   | c                                                                          | CTS    | plasma       | 0,07     | 0,5               |
| M   | d                                                                          | CTS    | plasma       | 0        | 1,1               |
| F   | d                                                                          | CTS    | plasma       | 0        | 0,2               |
| F   | b                                                                          | CTS    | plasma       | 0        | 0,4               |
| M   | c                                                                          | CTS    | plasma       | 0        | 0,5               |
| F   | d                                                                          | CTS    | plasma       | 0        | 2,7               |
| F   | c                                                                          | CTS    | plasma       | 0        | 2,1               |
| M   | c                                                                          | CTS    | plasma       | 0        | 1,5               |
| M   | d                                                                          | CTS    | plasma       | 0        | 0,9               |
